# Supplementary material for: Construction and validation of a robust epigenetic gene-set based signature in ovarian cancer
Source: Research Square preprint supplement (doi:10.21203/rs.3.rs-123005/v1), 2020-12-10
Supplement: Supplementary file 1 [file a16521b500f5fc2bf742fd23.xlsx]

## Sheet: result_表观
Table S1. Prognostic epigenetic genes in discovery set.
Gene	HR	95%CI_lower	95%CI_upper	P value
TRIM27	0.695983	0.583652	0.829933	5.44579e-05
MAZ	0.583092	0.422102	0.805484	0.00106733
WDR77	0.780446	0.664408	0.916751	0.00254202
DAXX	0.737099	0.601243	0.903653	0.00333937
CARM1	0.738605	0.601767	0.906558	0.00375097
PAXIP1	0.805563	0.693547	0.93567	0.00464891
SCMH1	0.760103	0.626772	0.921796	0.00531203
EHMT2	0.700577	0.545296	0.900077	0.00537903
TRIM24	0.740326	0.587781	0.93246	0.0106504
BRD2	0.767166	0.625441	0.941007	0.0109764
EZH2	0.871232	0.782161	0.970446	0.0122395
BCOR	0.79176	0.659263	0.950887	0.0124569
EXOSC4	0.845102	0.740184	0.964892	0.0128321
HIRA	0.795028	0.661538	0.955454	0.0144507
PPM1G	0.789603	0.651336	0.957221	0.0161678
ELP3	0.808544	0.678757	0.963148	0.0172863
SMARCAL1	0.76947	0.619161	0.956268	0.0181166
DDB2	0.820047	0.69435	0.968499	0.0194392
UBR2	0.781107	0.634843	0.96107	0.019526
RB1	1.38552	1.05155	1.82555	0.0204957
HSPA1A	0.918563	0.854664	0.98724	0.0209399
MEN1	0.799364	0.660675	0.967166	0.0212595
HLCS	0.554575	0.334846	0.918491	0.0220064
NIPBL	0.80651	0.670351	0.970326	0.0226523
SMARCB1	0.813087	0.679091	0.973523	0.024321
ZMYM3	0.773098	0.617752	0.967508	0.0245393
PADI4	0.28912	0.0971403	0.860509	0.0257521
DNMT1	0.859693	0.75262	0.981999	0.0259061
CHEK1	0.862507	0.756749	0.983045	0.0266788
BRD9	0.785155	0.6334	0.973269	0.0272988
HIRIP3	0.799584	0.655067	0.975984	0.0278807
PARP2	0.832178	0.706215	0.980609	0.0282494
CBX5	0.843509	0.724195	0.982479	0.0287331
APOBEC3G	0.89917	0.817394	0.989126	0.0289104
RAD54L	0.81337	0.674725	0.980505	0.0302771
RSF1	0.856165	0.743844	0.985446	0.0304424
SYNCRIP	0.827306	0.695474	0.984127	0.032304
KEAP1	0.834811	0.704627	0.989048	0.0368632
ANP32E	0.859602	0.745096	0.991704	0.0380633
NAT10	0.830475	0.695881	0.991101	0.0394902
C14orf169	0.79729	0.642245	0.989764	0.0400515
EYA4	1.12862	1.00428	1.26834	0.0421803
EHMT1	1.83108	1.02039	3.28586	0.0425994
PHF20	1.32431	1.0085	1.73903	0.0432973
SETD8	0.717831	0.520449	0.990071	0.0433017
NFRKB	0.725244	0.531081	0.990393	0.0433123
MCRS1	0.781941	0.615228	0.993831	0.0443736
VRK1	0.874239	0.766577	0.997021	0.0450213
PAF1	1.14429	1.00111	1.30796	0.0481348
SMARCD1	0.665815	0.443568	0.999418	0.0496724
CHD2	0.507187	0.25748	0.999064	0.0496842
